# Supplementary material for: Age-related changes in Drosophila midgut are associated with PVF2, a PDGF/VEGF-like growth factor
Source: PubMed Central journal article supplement (PMC2408640; doi:10.1111/j.1474-9726.2008.00380.x), 2008-06

# Supplementary Figure. S1

## A wild-type

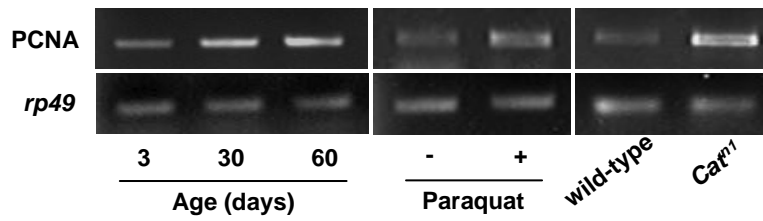

## B *Pvf2<sup>c06947</sup>*

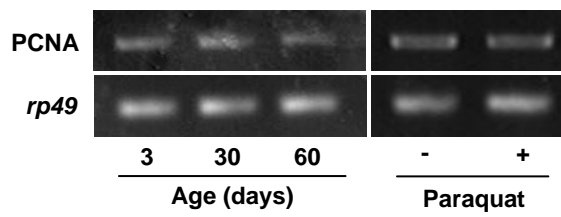

## C

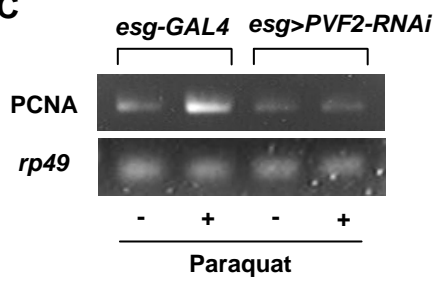

## Supplementary Figure. S2

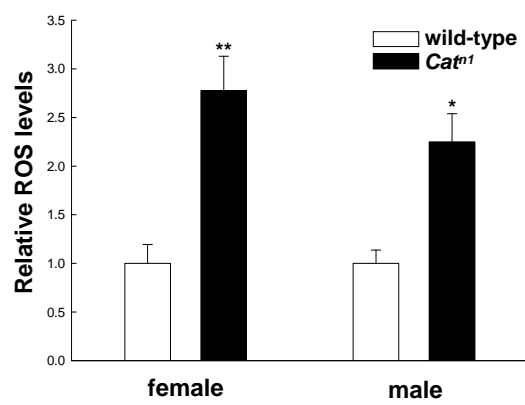

## Supplementary Figure. S3

**A**

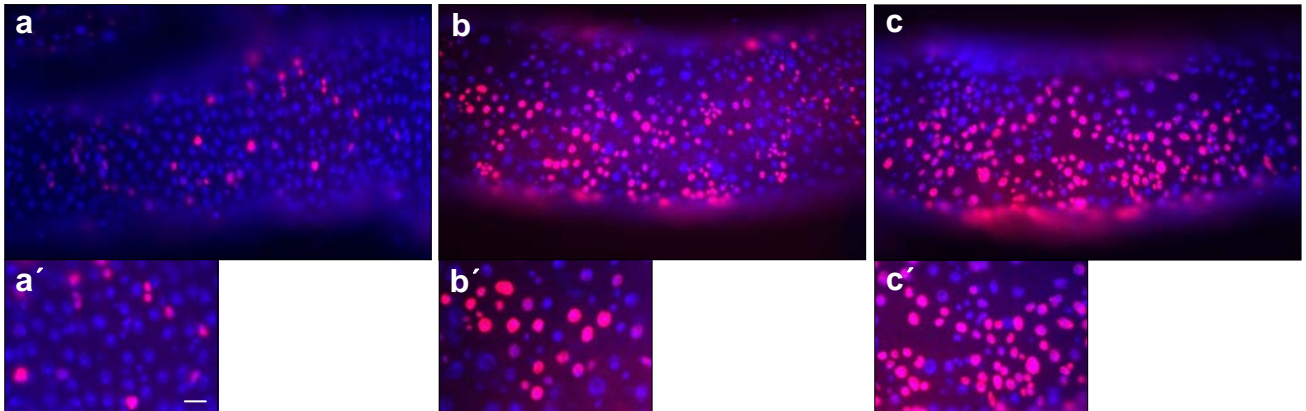

**B**

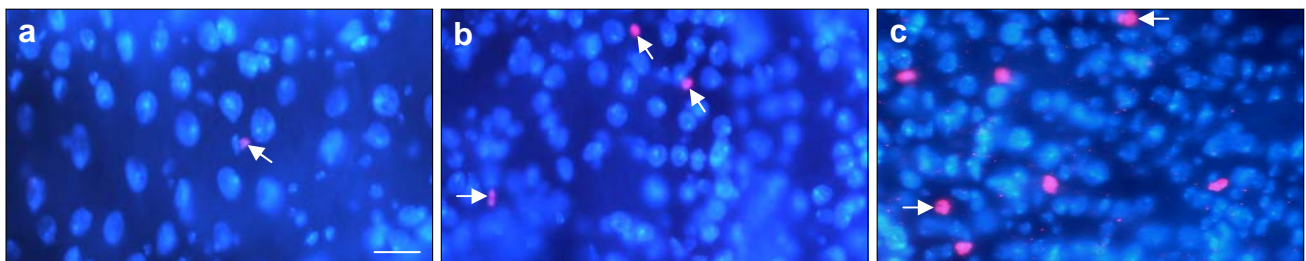

## Supplementary Figure. S4

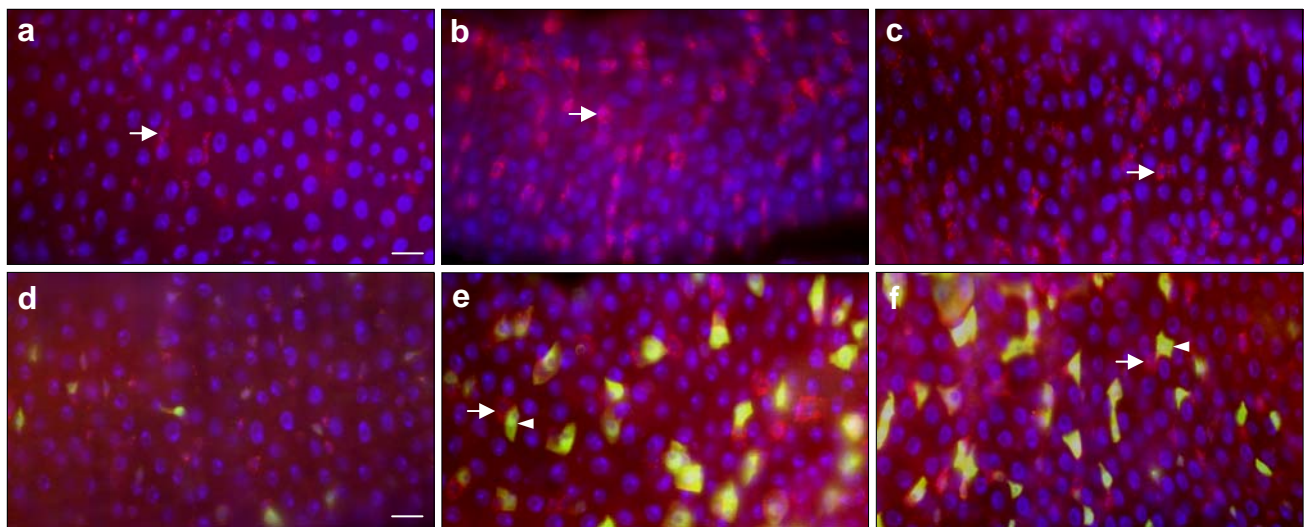

## Supplementary Figure. S5

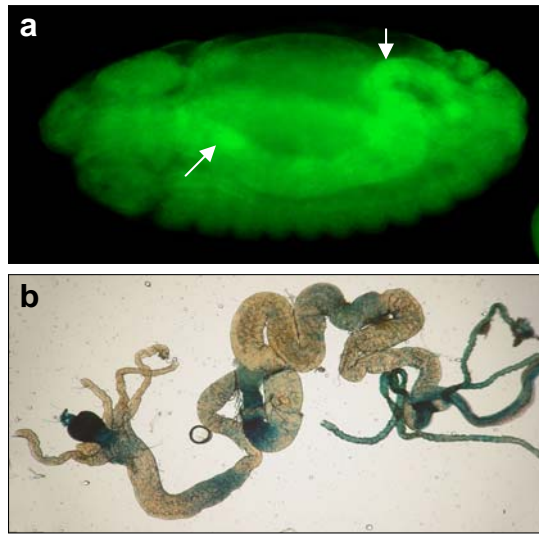

## Supplementary Figure. S6

**A**

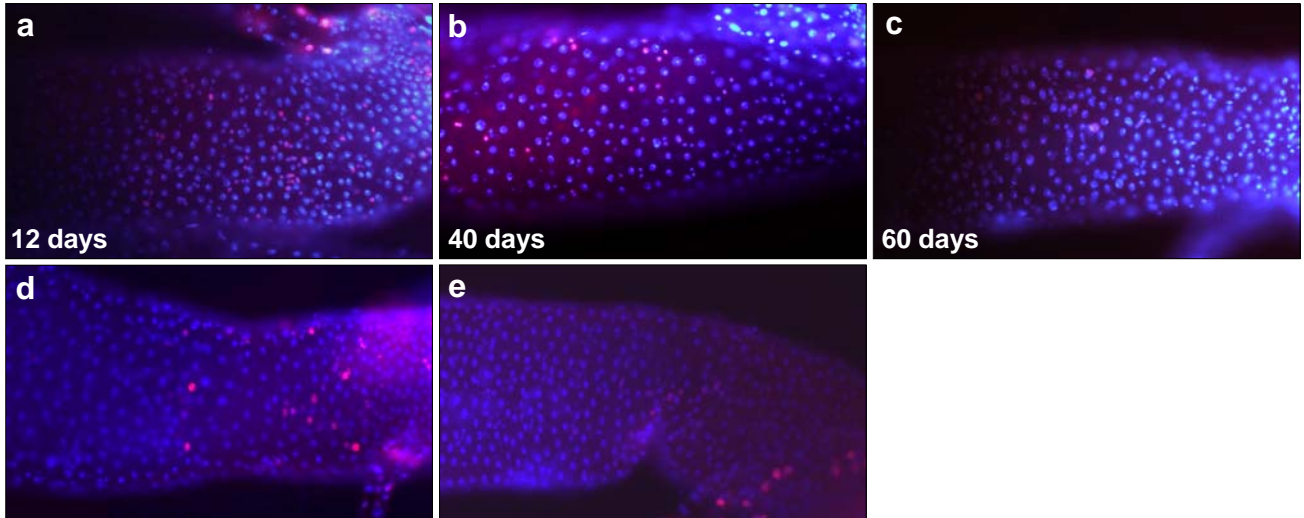

**B**

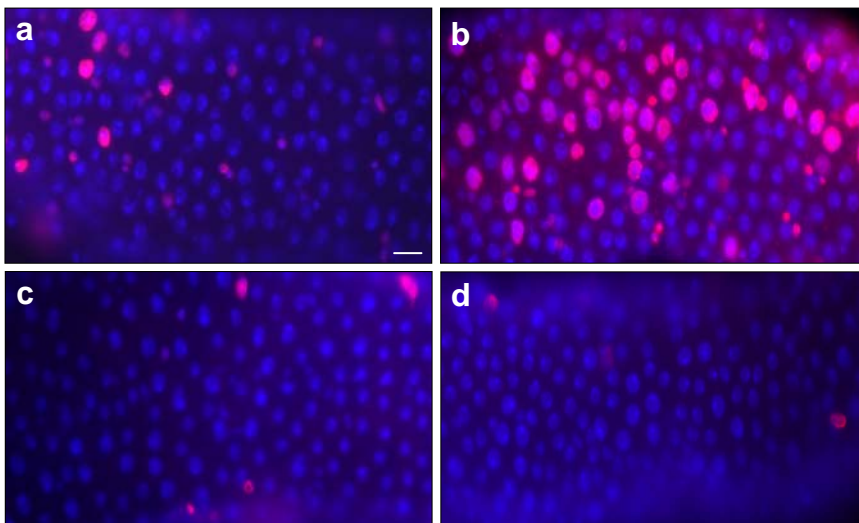

**C**

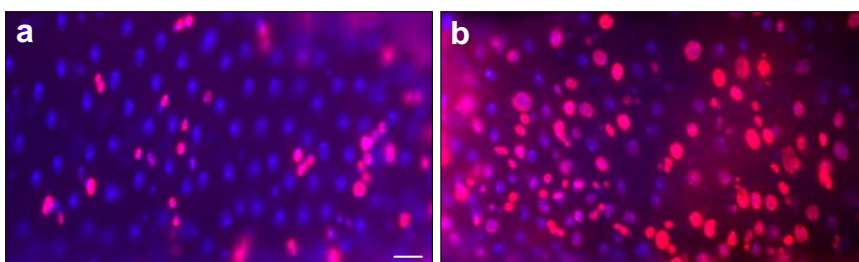

## Supplementary Figure. S7

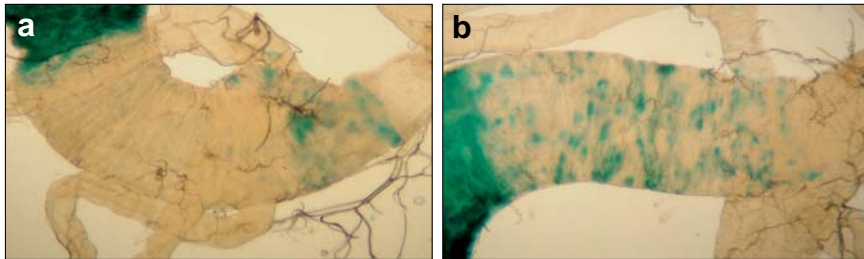

## Supplementary Figure. S8

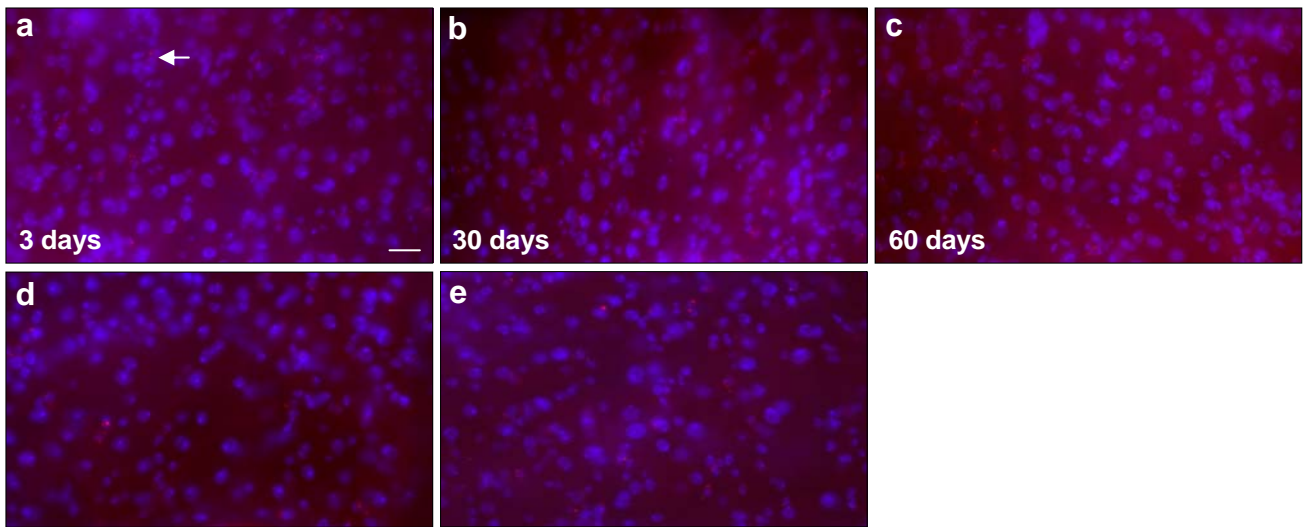

Supplement: ace0007-0318-SD1.pdf [file ace0007-0318-SD1.pdf]
